# Supplementary material
Source: PubMed Central journal article supplement (PMC2128741)
Supplement: NIHMS29839-supplement-Supplement.pdf [file NIHMS29839-supplement-Supplement.pdf]

## Supplemental Information

### Contents

#### 1. Merged PDF file containing:

##### A. Supplemental Figure and Legend

##### **Figure S1.** Translocation of Arrestin in Response to Light

Demonstrates the location of arrestin in photoreceptor cells under the lighting conditions used to isolate PSC complexes.

##### B. Supplemental Tables S5-S7

**Table S5.** Summary of Immunofluorescence Validation for Novel Putative PSC Complex Proteins

**Table S6.** Candidate Disease Genes

**Table S7.** Photoreceptor Proteins Used for Benchmarking the Quantitative Analysis

#### 2. Supplemental Data

**Table S1.** The complete mouse PSC complex proteome

Excel spreadsheet; includes the following worksheets:

A – Complete PSC Complex Proteome

B – PSC-OS group of proteins

C – PSC-IS group of proteins

D – Rootletin KO only proteins

E – Hypothetical proteins

F – Notes, with legends for A-E.

**Tables S2-S4:** Summaries of LC-MS/MS analyses, including MS/MS data and peptide sequences for:

**Table S2.** Wild-type PSC complex

**Table S3.** PSC complex-cytoskeleton

**Table S4.** Rootletin KO PSC complex

**Table S8.** Quantitative Analysis of PSC-OS Proteins

## A. Supplemental Figure

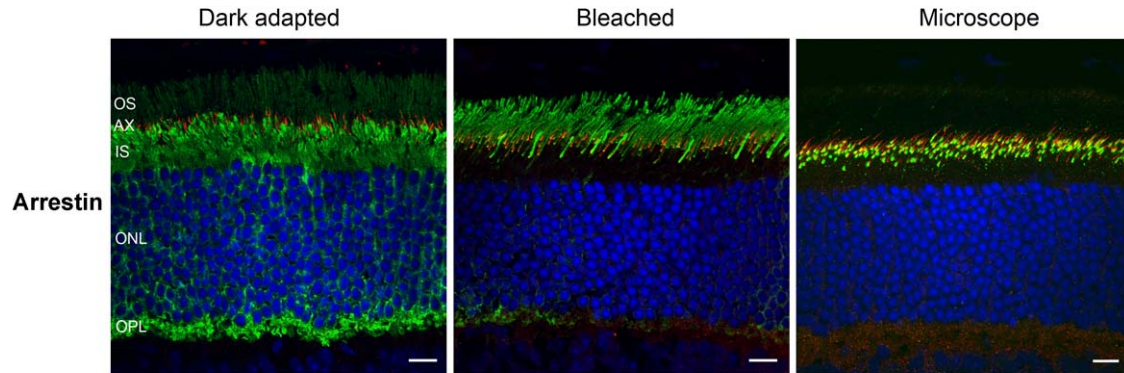

### **Figure S1.** Translocation of Arrestin in Response to Light

Frozen sections of retina were prepared from dark-adapted mice, mice exposed to 15K lux of light for 30 minutes to bleach to photoreceptors, and mice exposed to room light followed by a brief (10 second) exposure to the dissecting microscope light to mimic the conditions used for harvesting PSCs and PSC-cytoskeletons. Sections were stained with antibodies to arrestin (green). All sections were also stained with antibodies to Rpl in order to visualize the photoreceptor axoneme (red). In the dark adapted state, arrestin is located in the inner segments, cell bodies and synaptic terminals of photoreceptor cells. A strong, bleaching light exposure caused the majority of the arrestin to translocate into the outer segments of rod and cone photoreceptors. A brief exposure to the dissecting microscope light caused partial movement of arrestin, which has moved to the base of the inner segment; little arrestin has reached the OS under these conditions. AX, axoneme; IS, inner segment; ONL, outer nuclear layer; OPL, outer plexiform layer; OS, outer segment. Bars = 10  $\mu$ m.

| OS /IS <sup>a</sup> | Refseq Protein Name                                             | Refseq ID      | Total Peptides | Cilia Protein <sup>b</sup> | Antibody        | Source                    | Location <sup>c</sup> | Reference                                            |
|---------------------|-----------------------------------------------------------------|----------------|----------------|----------------------------|-----------------|---------------------------|-----------------------|------------------------------------------------------|
| IS                  | CLIP associating protein 1                                      | XP_889298.1    | 21             | Shared                     | 2292            | Fedor Severin             | PSC                   | <i>J Cell Biol.</i> 168:141-53, 2005                 |
| IS                  | CLIP associating protein 2                                      | NP_083909.1    | 17             |                            | 401             | Fedor Severin             | PSC                   |                                                      |
| IS                  | coronin, actin binding protein 1B                               | NP_035908.1    | 2              |                            | 4245            | James Bear                | PSC                   | <i>J Biol Chem.</i> 280:31913-23, 2005               |
| IS                  | doublecortin and calcium/calmodulin-dependent protein kinase II | NP_064362.1    | 8              |                            | 1380            | Joseph Gleeson            | PSC                   | <i>J Neurosci.</i> 20:9152, 2000                     |
| IS                  | excyst complex component 4                                      | NP_033174.2    | 12             |                            | Sec8            | Stressgen                 | PSC                   |                                                      |
| IS                  | huntingtin interacting protein 1 related                        | NP_659507.2    | 11             |                            | UM374, 1E1      | Theodora S. Ross          | PSC                   | <i>J Biol Chem.</i> 279:14294, 2004                  |
| IS                  | kinesin family member 2A                                        | NP_032468.1    | 6              | Shared                     | Kif2a           | Duane A. Compton          | PSC                   | <i>J Cell Biol.</i> 166:473, 2004                    |
| IS                  | myosin IB                                                       | NP_034993.2    | 16             |                            | 2652            | Peter G. Gillespie        | PSC                   | <i>J Neurosci.</i> 22:2487, 2002                     |
| IS                  | myosin XVIIIa                                                   | NP_035716.1    | 39             |                            | 434, 435        | Zissis C. Chronos         | PSC                   | <i>J Biol Chem.</i> 278:51448, 2003                  |
| IS                  | outer dense fiber of sperm tails 2                              | NP_038643.1    | 3              | Shared                     | ODF2            | Sigrid Hoyer-Fender       | PSC                   | <i>J Cell Sci.</i> 117:4643, 2004                    |
| IS                  | prosaposin                                                      | NP_035309.2    | 7              |                            | mSapD, mPS      | Grabowski GA              | PSC                   | <i>Mol Genet Metab.</i> 76:271, 2002                 |
| IS                  | RAB11a, member RAS oncogene family                              | NP_059078.2    | 9              | Shared                     | VU57            | Lynne A. Lapierre         | PSC                   | <i>Exp Cell Res.</i> 290:322, 2003                   |
| IS                  | synaptopodin 2                                                  | XP_001005167.1 | 7              |                            | Synpo2          | Peter Mundel              | PSC                   | <i>J Cell Biol.</i> 155:393, 2001                    |
| IS                  | syn trophin, basic 1                                            | NP_057876.1    | 4              |                            | SYN258          | Marvin Adams              | PSC                   |                                                      |
| IS                  | tropomyosin 4                                                   | NP_001001491.1 | 5              |                            | tropomyosin4    | Chemicon                  | PSC                   |                                                      |
| IS                  | microtubule-associated protein 7                                | NP_032661.1    | 10             |                            | Map7-N, Map7-C  | Makoto Suzuki             | Muller                | <i>J. Biol. Chem.</i> 278: 51448, 2003               |
| IS                  | syn trophin, basic 2                                            | NP_033255.1    | 5              |                            | SYN150          | Marvin Adams              | Syn                   |                                                      |
| IS                  | thioredoxin domain containing 5                                 | NP_663342.3    | 3              |                            | eRp46           | Marek Michalak            | IR, IS, ONL           |                                                      |
| OS                  | Bardet-Biedl syndrome 1 homolog                                 | NP_001028300.1 | 26             | Shared                     | bbs1            | Nicholas Katsanis         | PSC                   |                                                      |
| OS                  | Bardet-Biedl syndrome 2 homolog                                 | NP_080392.1    | 22             | Shared                     | bbs2            | Nicholas Katsanis         | PSC                   |                                                      |
| OS                  | Bardet-Biedl syndrome 4 homolog                                 | NP_780534.1    | 19             | Shared                     | bbs4            | Nicholas Katsanis         | PSC                   |                                                      |
| OS                  | Bardet-Biedl syndrome 5                                         | NP_082560.1    | 14             | Shared                     | bbs5            | Bradley K Yoder           | PSC                   |                                                      |
| OS                  | Bardet-Biedl syndrome 7                                         | NP_082086.1    | 31             | Shared                     | bbs7            | Nicholas Katsanis         | PSC                   |                                                      |
| OS                  | dynactin 1                                                      | NP_031861.1    | 35             | Shared                     | p150, 502, 235  | Erika Holzbaur            | PSC                   |                                                      |
| OS                  | dynactin 2                                                      | NP_081427.1    | 12             | Shared                     | p50, 1097       | Erika Holzbaur            | PSC                   |                                                      |
| OS                  | dynammin 2                                                      | NP_001034609.1 | 18             |                            | dynammin II     | BD Transduction           | PSC                   |                                                      |
| IS                  | dystonin                                                        | NP_598594.2    | 50             | Shared                     | 10C5            | Jonathan C. R. Jones      | PSC                   | <i>J Comp Neurol.</i> 487:190, 2005                  |
| OS                  | glutathione S-transferase, theta 1                              | NP_032211.2    | 5              | Shared                     | mGst1           | Philip Board              | PSC                   |                                                      |
| OS                  | glutathione S-transferase, theta 2                              | NP_034491.1    | 3              |                            | hGst2           | Philip Board              | PSC                   |                                                      |
| OS                  | glutathione transferase zeta 1                                  | NP_034493.1    | 8              |                            | Gstz            | Philip Board              | PSC                   | <i>Am. J Path.</i> 165:679, 2004                     |
| OS                  | hypoxia up-regulated 1                                          | NP_067370.2    | 18             |                            | 512 (Gp170)     | Xiang-Yang Wang           | PSC                   | <i>J Immunol.</i> 166: 490, 2001                     |
| OS                  | IQ motif containing GTPase activating protein 1                 | NP_057930.1    | 3              |                            | Iqgap1          | Santa Cruz Biotechnology  | PSC                   |                                                      |
| OS                  | kinectin 1                                                      | NP_032503.1    | 36             |                            | mln3, mln2      | Hanny Yu                  | PSC                   | <i>J Cell Sci.</i> 117:4537, 2004                    |
| OS                  | microtubule-actin crosslinking factor 1                         | XP_890015.2    | 135            |                            | CU119           | Ronald K. H. Liem         | PSC                   | <i>J Cell Sci.</i> 118:3727, 2005                    |
| OS                  | myosin, heavy polypeptide 9, non-muscle                         | NP_071855.1    | 39             | Shared                     | MHC II A        | Covance Research Products | PSC                   |                                                      |
| OS                  | myosin, heavy polypeptide 10, non-muscle                        | NP_780469.1    | 45             | Shared                     | MHC II B        | Covance Research Products | PSC                   |                                                      |
| OS                  | N-ethylmaleimide sensitive fusion protein                       | NP_032766.2    | 38             |                            | Nsf             | Masato Hirata             | PSC                   | <i>Mol Cell Neurosci.</i> 30:197, 2005               |
| OS                  | neurofascin                                                     | NP_874385.1    | 17             |                            | NFC             | Peter J. Brophy           | PSC                   | <i>J Cell Biol.</i> 150: 657, 2000                   |
| OS                  | plectin 1                                                       | NP_035247.1    | 78             | Shared                     | #46             | Garhard Wiche             | PSC                   | <i>J Invest Dermatol.</i> 120:189, 2003              |
| OS                  | Rab acceptor 1                                                  | NP_034391.1    | 2              |                            | Prenylin (RPA1) | Guangpu Li                | PSC                   | <i>Biochem. Biophys. Res. Commun.</i> 275, 509, 2000 |
| OS                  | RAB11B, member RAS oncogene family                              | NP_033023.1    | 12             |                            | VU96            | Lynne A. Lapierre         | PSC                   | <i>Exp Cell Res.</i> 290:322, 2003                   |
| OS                  | restin                                                          | NP_062739.2    | 15             | Shared                     | 2360, 1024      | Niels Galjart             | PSC                   |                                                      |
| OS                  | septin 5                                                        | NP_998779.1    | 12             |                            | Sept5           | Bill Trimble              | PSC                   |                                                      |
| OS                  | septin 11                                                       | NP_001009818.1 | 16             |                            | Sept11          | Bill Trimble              | PSC                   |                                                      |
| OS                  | NS1-associated protein 1                                        | NP_062640.1    | 15             |                            | 7772            | Michael Mueckler          | PSC                   | <i>J. Biol. Chem.</i> 277:25233, 2002                |
| OS                  | tetrapeptide repeat domain 8                                    | NP_083829.1    | 15             | Shared                     | bbs8            | Nicholas Katsanis         | PSC                   |                                                      |
| OS                  | thioredoxin domain containing 12                                | NP_079610.1    | 3              |                            | eRp19           | Marek Michalak            | PSC                   | <i>Mol. Cell. Proteomics</i> 2:1104, 2003            |
| OS                  | transgelin 3                                                    | NP_062728.1    | 8              |                            | NP25            | Yukio Okano               | PSC                   | <i>Neurosci Res.</i> 48:439, 2004                    |
| OS                  | chondroitin sulfate proteoglycan 4                              | NP_620570.1    | 11             |                            | NGC             | Atsuhiko Oohira           | IR                    | <i>J Biol Chem.</i> 270:26876, 1995                  |
| OS                  | septin 2                                                        | NP_035021.1    | 8              | Shared                     | Sept2           | Bill Trimble              | IR, IS                |                                                      |
| OS                  | septin 3                                                        | NP_036019.1    | 10             |                            | Sept3           | Bill Trimble              | IR                    |                                                      |

Notes: <sup>a</sup> IS, PSC-IS; OS, PSC-OS

<sup>b</sup> Cilia Protein: Shared with CiliaProteome database

<sup>c</sup> Locations: IR, inner retina; ONL, outer nuclear layer; PSC, specific PSC complex signal on frozen section and or isolated PSC complexes; SYN, synapse

| OMIMID                             | DISORDER                                           | Mouse Gene | Human Gene | Human Symbol | Protein Name                                                       | Human Map Location | Source | Reference                                          |
|------------------------------------|----------------------------------------------------|------------|------------|--------------|--------------------------------------------------------------------|--------------------|--------|----------------------------------------------------|
| <b>Retinal Disorders</b>           |                                                    |            |            |              |                                                                    |                    |        |                                                    |
| 215500                             | Central areolar choroidal dystrophy                | 13681      | 1973       | EIF4A1       | eukaryotic translation initiation factor 4A, isoform 1             | 17p13              | PSC-IS | <i>Cytogenet Cell Genet.</i> 93:43, 2001           |
| 605750                             | Exudative vitreoretinopathy-3                      | 20511      | 6506       | SLC1A2       | solute carrier family 1, member 2                                  | 11p13-p12          | PSC-OS | <i>Am. J. Hum. Genet.</i> 68: 778, 2001            |
| 604537                             | Leber congenital amaurosis 5                       | 75782      | 167691     | C6ORF152     | hypothetical protein LOC167691                                     | 6q11-q16           | PSC-OS | <i>Am. J. Hum. Genet.</i> 66: 319, 2000            |
|                                    |                                                    | 13627      | 1915       | EEF1A1       | eukaryotic translation elongation factor 1 alpha 1                 | 6q11-q16           | PSC-OS |                                                    |
|                                    |                                                    | 382090     | 22832      | KIAA1009     | KIAA1009 protein                                                   | 6q11-q16           | PSC-IS |                                                    |
|                                    |                                                    | 17920      | 4646       | MYO6         | myosin VI                                                          | 6q11-q16           | PSC-OS |                                                    |
|                                    |                                                    | 116837     | 22999      | RIMS1        | regulating synaptic membrane exocytosis 1                          | 6q11-q16           | PSC-OS |                                                    |
|                                    |                                                    | 212531     | 83699      | SH3BGLR2     | SH3 domain binding glutamic acid-rich protein like 2               | 6q11-q16           | PSC-IS |                                                    |
|                                    |                                                    | 20616      | 9892       | SNAP91       | synaptosomal-associated protein 91                                 | 6q11-q16           | PSC-OS |                                                    |
|                                    |                                                    | 56403      | 10492      | SYNCRIP      | NS1-associated protein 1                                           | 6q11-q16           | PSC-OS |                                                    |
|                                    |                                                    | 69981      | 55754      | TMEM30A      | transmembrane protein 30A                                          | 6q11-q16           | PSC-OS |                                                    |
| 153840                             | Macular dystrophy, atypical vitelliform            | 239528     | 27161      | EIF2C2       | eukaryotic translation initiation factor 2C, 2                     | 8q24               | PSC-IS | <i>Am. J. Hum. Genet.</i> 35: 78, 1983             |
|                                    |                                                    | 18810      | 5339       | PLEC1        | plectin 1                                                          | 8q24               | PSC-OS |                                                    |
| 300424                             | Retinitis pigmentosa 23                            | 57394      | 57393      | TMEM27       | transmembrane protein 27                                           | Xp22               | PSC-OS | <i>Invest. Ophthalmol. Vis. Sci.</i> 41:2080, 2000 |
| 300605                             | Retinitis pigmentosa 34                            | 320707     | 492        | ATP2B3       | ATPase, Ca++ transporting, plasma membrane 3                       | Xq28               | PSC-IS | <i>J. Med. Genet.</i> 43: e27, 2006                |
|                                    |                                                    | 27061      | 10134      | BCAP31       | B-cell receptor-associated protein 31                              | Xq28               | PSC-OS |                                                    |
|                                    |                                                    | 192176     | 2316       | FLNA         | filamin A, alpha (actin binding protein 280)                       | Xq28               | PSC-OS |                                                    |
|                                    |                                                    | 67391      | 65991      | FUNDC2       | FUN14 domain containing 2                                          | Xq28               | PSC-OS |                                                    |
|                                    |                                                    | 14567      | 2664       | GD1I         | guanosine diphosphate (GDP) dissociation inhibitor 1               | Xq28               | PSC-OS |                                                    |
|                                    |                                                    | 14539      | 2652       | OPN1MW       | opsin 1 (cone pigments), medium-wave-sensitive                     | Xp28               | PSC-OS |                                                    |
|                                    |                                                    | 67790      | 116442     | RAB39B       | RAB39B, member RAS oncogene family                                 | Xq28               | PSC-OS |                                                    |
|                                    |                                                    | 20832      | 6748       | SSR4         | signal sequence receptor, delta                                    | Xq28               | PSC-OS |                                                    |
|                                    |                                                    | 22327      | 7411       | VBP1         | von Hippel-Lindau binding protein 1                                | Xq28               | PSC-OS |                                                    |
| 192315                             | Retinopathy, vascular/cerebral/renal involvement   | 97541      | 5859       | OARS         | glutaminyl-tRNA synthetase                                         | 3p21.3-p21.1       | PSC-IS | <i>Am. J. Hum. Genet.</i> 69:447, 2001             |
| 193235                             | Vitreoretinopathy, neovascular inflammatory        | 13043      | 2017       | CTTN         | cortactin                                                          | 11q13              | PSC-OS | <i>Hum. Molec. Genet.</i> 1: 685, 1992             |
| <b>Other Eye Disorders</b>         |                                                    |            |            |              |                                                                    |                    |        |                                                    |
| 310460                             | Bornholm eye disease/Myopia-1                      | 320707     | 492        | ATP2B3       | ATPase, Ca++ transporting, plasma membrane 3                       | Xq28               | PSC-IS | <i>Clin. Genet.</i> 38: 281, 1990                  |
|                                    |                                                    | 27061      | 10134      | BCAP31       | B-cell receptor-associated protein 31                              | Xq28               | PSC-OS |                                                    |
|                                    |                                                    | 26370      | 1069       | CETN2        | centrin, EF-hand protein, 2                                        | Xq28               | PSC-OS |                                                    |
|                                    |                                                    | 192176     | 2316       | FLNA         | filamin A, alpha (actin binding protein 280)                       | Xq28               | PSC-OS |                                                    |
|                                    |                                                    | 67391      | 65991      | FUNDC2       | FUN14 domain containing 2                                          | Xq28               | PSC-OS |                                                    |
|                                    |                                                    | 14567      | 2664       | GD1I         | guanosine diphosphate (GDP) dissociation inhibitor 1               | Xq28               | PSC-OS |                                                    |
|                                    |                                                    | 53332      | 8776       | MTMR1        | myotubularin related protein 1                                     | Xq28               | PSC-IS |                                                    |
|                                    |                                                    | 67790      | 116442     | RAB39B       | RAB39B, member RAS oncogene family                                 | Xq28               | PSC-OS |                                                    |
|                                    |                                                    | 20832      | 6748       | SSR4         | signal sequence receptor, delta                                    | Xq28               | PSC-OS |                                                    |
|                                    |                                                    | 22327      | 7411       | VBP1         | von Hippel-Lindau binding protein 1                                | Xq28               | PSC-OS |                                                    |
| 156850                             | Cataract, congenital, with microphthalmia          | 268932     | 57524      | CASKIN1      | CASK interacting protein 1                                         | 16p13.3            | PSC-OS | <i>Hum. Genet.</i> 90: 177, 1992.                  |
|                                    |                                                    | 15369      | 3163       | HMOX2        | heme oxygenase (decycling) 2                                       | 16p13.3            | PSC-IS |                                                    |
|                                    |                                                    | 106633     | 9742       | IFT140       | intraflagellar transport 140 homolog                               | 16p13.3            | PSC-OS |                                                    |
|                                    |                                                    | 30957      | 23162      | MAPK8IP3     | mitogen-activated protein kinase 8 interacting protein 3           | 16p13.3            | PSC-IS |                                                    |
|                                    |                                                    | 214952     | 89941      | RHOT2        | ras homolog gene family, member T2                                 | 16p13.3            | PSC-OS |                                                    |
|                                    |                                                    | 66049      | 79641      | ROGDI        | rogdi homolog (Drosophila)                                         | 16p13.3            | PSC-IS |                                                    |
|                                    |                                                    | 68015      | 10131      | TRAP1        | TNF receptor-associated protein 1                                  | 16p13.3            | PSC-OS |                                                    |
| 217400                             | Corneal dystrophy and perceptive deafness 1        | 77006      | 65992      | C20orf116    | chromosome 20 open reading frame 116                               | 20p13              | PSC-OS | <i>J. Med. Genet.</i> 39: 110, 2002.               |
|                                    |                                                    | 67134      | 10528      | NOL5A        | nucleolar protein 5A                                               | 20p13              | PSC-IS |                                                    |
|                                    |                                                    | 386649     | 55968      | NSFL1C       | NSFL1 (p97) cofactor (p47)                                         | 20p13              | PSC-IS |                                                    |
|                                    |                                                    | 19261      | 140886     | SIRPA        | signal-regulatory protein alpha                                    | 20p13              | PSC-IS |                                                    |
| 602082                             | Corneal dystrophy, Thiel-Behnke type               | 107338     | 8729       | GBF1         | golgii-specific brefeldin A resistance factor 1                    | 10q24              | PSC-IS | <i>Genomics</i> 46: 152, 1997.                     |
|                                    |                                                    | 73728      | 5662       | PSD          | pleckstrin and Sec7 domain containing                              | 10q24              | PSC-IS |                                                    |
| 126800                             | Duane syndrome                                     | 211673     | 10565      | ARFGEF1      | ADP-ribosylation factor guanine nucleotide-exchange factor 1       | 8q13               | PSC-IS | <i>Hum. Genet.</i> 108: 398, 2001                  |
|                                    |                                                    | 70675      | 80124      | VCPIP1       | valosin containing protein (p97)/p47 complex interacting protein 1 | 8q13               | PSC-IS |                                                    |
| 164100                             | Nystagmus-2, autosomal dominant                    | 15516      | 3326       | HSP90AB1     | heat shock protein 90kDa alpha, class B member 1                   | 6p12               | PSC-OS | <i>Am. J. Ophthalmol.</i> 125: 64, 1998.           |
| <b>Renal Disorders</b>             |                                                    |            |            |              |                                                                    |                    |        |                                                    |
| 161900                             | Nephropathy-hypertension                           | 213498     | 9826       | ARHGEF11     | Rho guanine nucleotide exchange factor (GEF) 11                    | 1q21               | PSC-IS | <i>Am. J. Hum. Genet.</i> 67: 647, 2000.           |
|                                    |                                                    | 23831      | 23632      | CA14         | carbonic anhydrase XIV                                             | 1q21               | PSC-OS |                                                    |
|                                    |                                                    | 17827      | 4580       | MTX1         | metaxin 1                                                          | 1q21               | PSC-IS |                                                    |
|                                    |                                                    | 229589     | 58497      | PRUNE        | prune homolog (Drosophila)                                         | 1q21               | PSC-OS |                                                    |
| <b>Deafness</b>                    |                                                    |            |            |              |                                                                    |                    |        |                                                    |
| 120502                             | Branchiootic syndrome 2 (BOS2)                     | 14645      | 2752       | GLUL         | glutamate-ammonia ligase (glutamine synthetase)                    | 1q31               | PSC-OS | <i>Am. J. Hum. Genet.</i> 66: 1715, 2000.          |
| 608372                             | Deafness, autosomal dominant 49 (DFNA49)           | 98660      | 477        | ATP1A2       | ATPase, Na+/K+ transporting, alpha 2 (+) polypeptide               | 1q21-q23           | PSC-OS | <i>J. Med. Genet.</i> 40: 832, 2003.               |
| 607239                             | Deafness, autosomal recessive 33 (DFNB33)          | 227634     | 157922     | CAMSAP1      | calmodulin regulated spectrin-associated protein 1                 | 9q34.3             | PSC-IS | <i>Europ. J. Hum. Genet.</i> 10: 391, 2002.        |
|                                    |                                                    | 227648     | 9919       | KIAA0310     | KIAA0310                                                           | 9q34.3             | PSC-IS |                                                    |
| 605429                             | Deafness, nonsyndromic, modifier 1 (DFNM1)         | 11931      | 481        | ATP1B1       | ATPase, Na+/K+ transporting, beta 1 polypeptide                    | 1q24               | PSC-OS | <i>Nature Genet.</i> 26: 431, 2000.                |
|                                    |                                                    | 171567     | 29922      | NME7         | non-metastatic cells 7, protein expressed in                       | 1q24               | PSC-OS |                                                    |
| 304500                             | Deafness, X-linked 2, perceptive congenital (DFN2) | 18823      | 5354       | PLP1         | proteolipid protein (myelin) 1                                     | Xq22               | PSC-IS | <i>Hum. Molec. Genet.</i> 5: 2055, 1996            |
| 300066                             | Deafness, X-linked 6, sensorineural (DFN6)         | 57394      | 57393      | TMEM27       | transmembrane protein 27                                           | Xp22               | PSC-OS | <i>Hum. Molec. Genet.</i> 5: 1383, 1996            |
| <b>Neurodegenerative Disorders</b> |                                                    |            |            |              |                                                                    |                    |        |                                                    |
| 108600                             | Spastic ataxia, autosomal dominant (SAX1)          | 12034      | 11331      | PHB2         | prohibitin 2                                                       | 12p13              | PSC-OS | <i>Am. J. Med. Genet.</i> 131A: 249, 2004.         |
| 600223                             | Spinocerebellar ataxia-4 (SCA4)                    | 102339     | 25839      | COG4         | component of oligomeric golgi complex 4                            | 16q22.1            | PSC-IS | <i>J. Neurol.</i> 250: 668, 2003                   |
|                                    |                                                    | 13680      | 55308      | DDX19A       | DEAD (Asp-Glu-Ala-As) box polypeptide 19A                          | 16q22.1            | PSC-OS |                                                    |
|                                    |                                                    | 234663     | 1783       | DYNC1L12     | dynein, cytoplasmic 1, light intermediate chain 2                  | 16q22.1            | PSC-OS |                                                    |
|                                    |                                                    | 234699     | 23644      | EDC4         | enhancer of mRNA decapping 4                                       | 16q22.1            | PSC-OS |                                                    |
|                                    |                                                    | 116733     | 27183      | VPS4A        | vacuolar protein sorting 4A                                        | 16q22.1            | PSC-IS |                                                    |

| Protein                           | Spectra PSC <sup>a</sup>                                                                                                                                                                                                                                                                                                                                                                                                                                                                                                                                                                                                                                                                                                                                                                                                                                                                                                                       | Predicted Peptides <sup>b</sup> | S/PP   | Rho/Protein <sup>c</sup> | Adjusted Rho/Protein <sup>d</sup> | Protein/Rho <sup>e</sup> | Molecules/Rod <sup>f</sup> | Notes | Reference                                               |
|-----------------------------------|------------------------------------------------------------------------------------------------------------------------------------------------------------------------------------------------------------------------------------------------------------------------------------------------------------------------------------------------------------------------------------------------------------------------------------------------------------------------------------------------------------------------------------------------------------------------------------------------------------------------------------------------------------------------------------------------------------------------------------------------------------------------------------------------------------------------------------------------------------------------------------------------------------------------------------------------|---------------------------------|--------|--------------------------|-----------------------------------|--------------------------|----------------------------|-------|---------------------------------------------------------|
| Rho                               | 494                                                                                                                                                                                                                                                                                                                                                                                                                                                                                                                                                                                                                                                                                                                                                                                                                                                                                                                                            | 1                               | 494.00 | 1.00                     | 1.00                              | 1.00E+00                 | 7.00E+07                   | (1)   | <i>Vision Res.</i> 44:3235, 2004                        |
| Gnat1                             | 2097                                                                                                                                                                                                                                                                                                                                                                                                                                                                                                                                                                                                                                                                                                                                                                                                                                                                                                                                           | 16                              |        |                          |                                   |                          |                            |       |                                                         |
| Gnb1                              | 602                                                                                                                                                                                                                                                                                                                                                                                                                                                                                                                                                                                                                                                                                                                                                                                                                                                                                                                                            | 15                              |        |                          |                                   |                          |                            |       |                                                         |
| Gngt1                             | 19                                                                                                                                                                                                                                                                                                                                                                                                                                                                                                                                                                                                                                                                                                                                                                                                                                                                                                                                             | 4                               |        |                          |                                   |                          |                            |       |                                                         |
| Transducin Holoprotein            | 2718                                                                                                                                                                                                                                                                                                                                                                                                                                                                                                                                                                                                                                                                                                                                                                                                                                                                                                                                           | 35                              | 77.66  | 12.00                    | 14.00                             | 7.14E-02                 | 5.00E+06                   | (2)   | <i>Science</i> 282:117, 1998; <i>Neuron</i> 34:95, 2002 |
| Sag                               | 1276                                                                                                                                                                                                                                                                                                                                                                                                                                                                                                                                                                                                                                                                                                                                                                                                                                                                                                                                           | 20                              | 63.80  | 1.28                     | 25.60                             | 3.91E-02                 | 2.73E+06                   | (3)   | <i>J. Neurosci.</i> 26:1146, 2006                       |
| Pde6a                             | 274                                                                                                                                                                                                                                                                                                                                                                                                                                                                                                                                                                                                                                                                                                                                                                                                                                                                                                                                            | 53                              |        |                          |                                   |                          |                            |       |                                                         |
| Pde6b                             | 568                                                                                                                                                                                                                                                                                                                                                                                                                                                                                                                                                                                                                                                                                                                                                                                                                                                                                                                                            | 48                              |        |                          |                                   |                          |                            |       |                                                         |
| Pde6g                             | 7                                                                                                                                                                                                                                                                                                                                                                                                                                                                                                                                                                                                                                                                                                                                                                                                                                                                                                                                              | 2                               |        |                          |                                   |                          |                            |       |                                                         |
| PDE Holoprotein                   | 849                                                                                                                                                                                                                                                                                                                                                                                                                                                                                                                                                                                                                                                                                                                                                                                                                                                                                                                                            | 103                             | 8.24   | 65.00                    | 65.00                             | 1.54E-02                 | 1.08E+06                   | (4)   | <i>J. Neurosci.</i> 23:1287, 2003                       |
| Rds                               | 136                                                                                                                                                                                                                                                                                                                                                                                                                                                                                                                                                                                                                                                                                                                                                                                                                                                                                                                                            | 13                              | 10.46  | 180.00                   | 180.00                            | 5.56E-03                 | 3.89E+05                   |       | <i>Biochemistry</i> 35:6144, 1996                       |
| Rom1                              | 78                                                                                                                                                                                                                                                                                                                                                                                                                                                                                                                                                                                                                                                                                                                                                                                                                                                                                                                                             | 8                               | 9.75   | 180.00                   | 180.00                            | 5.56E-03                 | 3.89E+05                   |       | <i>Biochemistry</i> 35:6144, 1996                       |
| Grk1                              | 218                                                                                                                                                                                                                                                                                                                                                                                                                                                                                                                                                                                                                                                                                                                                                                                                                                                                                                                                            | 25                              | 8.72   | 600.00                   | 600.00                            | 1.67E-03                 | 1.17E+05                   |       | <i>J. Biol. Chem.</i> 270:16147, 1995;                  |
| Pdc                               | 72                                                                                                                                                                                                                                                                                                                                                                                                                                                                                                                                                                                                                                                                                                                                                                                                                                                                                                                                             | 13                              | 5.54   | 14.00                    | 120.00                            | 8.33E-03                 | 5.83E+05                   | (5)   | <i>J. Biol. Chem.</i> 279:19149, 2004                   |
| Gucy2e                            | 229                                                                                                                                                                                                                                                                                                                                                                                                                                                                                                                                                                                                                                                                                                                                                                                                                                                                                                                                            | 46                              | 4.98   | 260.00                   | 260.00                            | 3.85E-03                 | 2.69E+05                   |       | <i>Eur. J. Biochem.</i> 270:3814, 2003                  |
| Abca4                             | 402                                                                                                                                                                                                                                                                                                                                                                                                                                                                                                                                                                                                                                                                                                                                                                                                                                                                                                                                            | 104                             | 3.87   | 120.00                   | 120.00                            | 8.33E-03                 | 5.83E+05                   |       | <i>Nat. Genet.</i> 17:15, 1997                          |
| Rcvrn                             | 73                                                                                                                                                                                                                                                                                                                                                                                                                                                                                                                                                                                                                                                                                                                                                                                                                                                                                                                                             | 14                              | 5.21   | 12.50                    | 104.00                            | 9.62E-03                 | 6.73E+05                   | (6)   | <i>J. Biol. Chem.</i> 280:29250, 2005                   |
| Slc24a1                           | 202                                                                                                                                                                                                                                                                                                                                                                                                                                                                                                                                                                                                                                                                                                                                                                                                                                                                                                                                            | 44                              | 4.59   | 800.00                   | 800.00                            | 1.25E-03                 | 8.75E+04                   |       | <i>J. Biol. Chem.</i> 263:11382, 1998                   |
| Rgs9                              | 97                                                                                                                                                                                                                                                                                                                                                                                                                                                                                                                                                                                                                                                                                                                                                                                                                                                                                                                                             | 42                              | 2.31   | 610.00                   | 610.00                            | 1.64E-03                 | 1.15E+05                   |       | <i>J. Neurosci.</i> 23:1287, 2003                       |
| Guca1b                            | 16                                                                                                                                                                                                                                                                                                                                                                                                                                                                                                                                                                                                                                                                                                                                                                                                                                                                                                                                             | 8                               | 2.00   | 1100.00                  | 1100.00                           | 9.09E-04                 | 6.36E+04                   |       | <i>Eur. J. Biochem.</i> 270:3814, 2003                  |
| Guca1a                            | 22                                                                                                                                                                                                                                                                                                                                                                                                                                                                                                                                                                                                                                                                                                                                                                                                                                                                                                                                             | 12                              | 1.83   | 900.00                   | 900.00                            | 1.11E-03                 | 7.78E+04                   |       | <i>Eur. J. Biochem.</i> 270:3814, 2003                  |
| <sup>a</sup> Spectra PSC          | Total number of MS/MS spectra observed from all specific peptides from designated protein.                                                                                                                                                                                                                                                                                                                                                                                                                                                                                                                                                                                                                                                                                                                                                                                                                                                     |                                 |        |                          |                                   |                          |                            |       |                                                         |
| <sup>b</sup> Predicted Peptides   | Determined as described in Supplementary Methods                                                                                                                                                                                                                                                                                                                                                                                                                                                                                                                                                                                                                                                                                                                                                                                                                                                                                               |                                 |        |                          |                                   |                          |                            |       |                                                         |
| <sup>c</sup> Rho/Protein          | Reported amount of protein from literature, expressed in terms of ratio to rhodopsin                                                                                                                                                                                                                                                                                                                                                                                                                                                                                                                                                                                                                                                                                                                                                                                                                                                           |                                 |        |                          |                                   |                          |                            |       |                                                         |
| <sup>d</sup> Adjusted Rho/Protein | Value from Rho/Protein column adjusted for individual proteins; see Notes below                                                                                                                                                                                                                                                                                                                                                                                                                                                                                                                                                                                                                                                                                                                                                                                                                                                                |                                 |        |                          |                                   |                          |                            |       |                                                         |
| <sup>e</sup> Protein/Rho          | Inverse of Adjusted Rho/Protein value                                                                                                                                                                                                                                                                                                                                                                                                                                                                                                                                                                                                                                                                                                                                                                                                                                                                                                          |                                 |        |                          |                                   |                          |                            |       |                                                         |
| <sup>f</sup> Molecules/Rod        | Protein/Rho multiplied by 7E+07                                                                                                                                                                                                                                                                                                                                                                                                                                                                                                                                                                                                                                                                                                                                                                                                                                                                                                                |                                 |        |                          |                                   |                          |                            |       |                                                         |
| Notes                             | <ol style="list-style-type: none"> <li>The spectral count data for rhodopsin used for this analysis are derived from the more hydrophilic C-terminus of the protein, which generates a single tryptic peptide (NPLGDDASATASK)</li> <li>Immunofluorescence analysis (not shown) showed 85% transducin in outer segment under lighting conditions used for PSC complex isolation.</li> <li>Immunofluorescence analysis (Figure S1) showed 5% of arrestin in outer segment under lighting conditions used for PSC complex isolation.</li> <li>Stoichiometry of subunits 1:1:2</li> <li>12.5% of phosducin is reported to be located in the outer segment</li> <li>Since transducin and arrestin were found to be in their dark-adapted locations under the lighting conditions used for PSC complex isolation, it was assumed that recoverin was also in its dark-adapted location, with 12% of the total protein in the outer segment</li> </ol> |                                 |        |                          |                                   |                          |                            |       |                                                         |
